# Supplementary material
Source: PubMed Central journal article supplement (PMC2848896)

**Suppl. Figure 1.** TL1 ES cells were seeded in 96-well plates at  $4 \times 10^3$  cells/well in the presence of recombinant ExTek or control BSA at 100ng/ml, respectively, for 24 hr. WST-1 cell proliferation reagent (10  $\mu$ l/well) was added, and incubated for additional 1, 2 and 4 hr. Absorbance at 450 nm was measured in a multiwell plate reader. The data were mean  $\pm$  SE.

**Suppl. Figure 2.** Tibia metastatic bone tissues were incubated with anti CD31 antibody for tumor vasculature. CD31 positive staining was quantitated from size-matched tumor sections and graphed between control AdGFP and AdExTek treated groups. \* $p < 0.05$ .

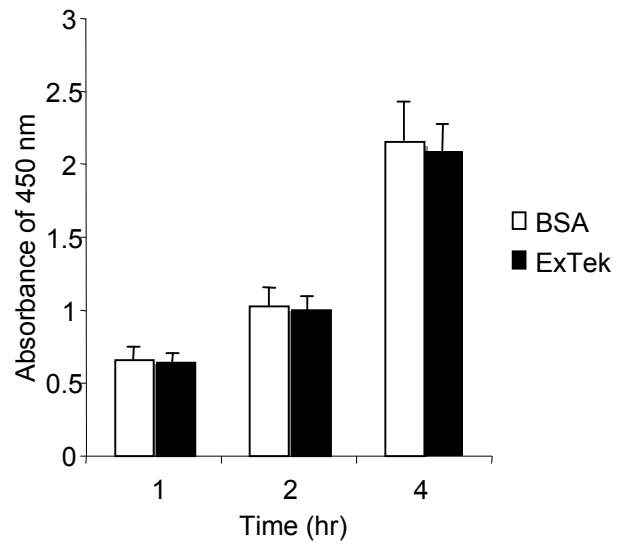

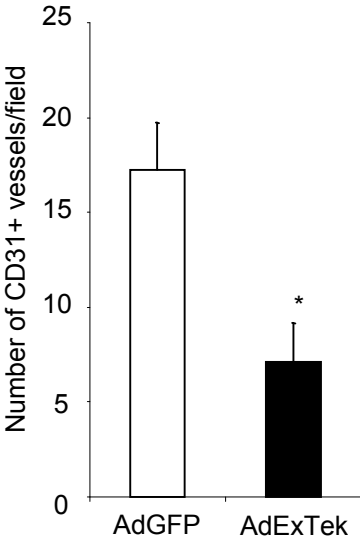

Supplement: NIHMS174219-supplement-1.pdf [file NIHMS174219-supplement-1.pdf]
